# Supplementary material
Source: HighWire-hosted journal article supplement (https://www.annfammed.org/highwire/filestream/7882/field_highwire_adjunct_files/1/Peltenburg_Suppl_Table.pdf)
Supplement: Peltenburg_Suppl_Table.pdf [file Peltenburg_Suppl_Table.pdf]

**Online Supplementary Material**

Peltenburg M, Fischer JE, Bahrs O, van Dulmen S, van den Brink-Muinen A. The unexpected in primary care: a multicenter study on the emergence of unvoiced patient agenda. *Ann Fam Med.* 2004;2:534-540.

<http://www.annfammed.org/cgi/content/full/2/6/534/DC1>

| <b>Supplemental Table. Patient and Physician Characteristics of Study Sample</b> |                       |                          |                            |                |
|----------------------------------------------------------------------------------|-----------------------|--------------------------|----------------------------|----------------|
| <b>Variables</b>                                                                 | <b>Range or Level</b> | <b>Included in Study</b> | <b>Excluded From Study</b> | <b>P Value</b> |
| <b>Patient baseline variables</b>                                                |                       |                          |                            |                |
| Number                                                                           |                       | 2,243                    | 1,431                      |                |
| Age, years                                                                       | 19–82                 | 45.6                     | 44.4                       | .20            |
| Sex, % women                                                                     | 2                     | 60.4                     | 57.4                       | .05            |
| Highest level of education*                                                      | 3                     | 1.8                      | 1.8                        | .10            |
| Number of years being patient of this physician                                  | 0–30                  | 10.1                     | 11.1                       | .30            |
| Number of consultations during the past year                                     | 0–39                  | 7.5                      | 7.6                        | .35            |
| <b>Patient health status, expectations, and requests</b>                         |                       |                          |                            |                |
| During the past 2 weeks:                                                         |                       |                          |                            |                |
| Hardest physical activity you could do for at least 2 minutes?                   | 5                     | 2.7                      | 2.7                        | .52            |
| Bothered by emotional problems?                                                  | 5                     | 2.3                      | 2.3                        | .79            |
| Difficulty doing usual tasks because of health?                                  | 5                     | 2.2                      | 2.2                        | .36            |
| Limitation of social activities (family, friends, neighbours)?                   | 5                     | 1.8                      | 1.7                        | .05            |
| Overall health now compared with 2 weeks ago?                                    | 5                     | 3.0                      | 3.0                        | .29            |
| How would you rate your health in general?                                       | 5                     | 3.2                      | 3.2                        | .40            |
| How much bodily pain did you have?                                               | 5                     | 2.8                      | 2.8                        | .80            |
| Raw summary score of biomedical expectations                                     | 0–21                  | 10.1                     | 9.7                        | .20            |
| Raw summary score of psychosocial expectations                                   | 0–12                  | 2.4                      | 2.5                        | .17            |
| Patient voiced psychosocial issue as reason for encounter, %                     | 2                     | 8.3                      | 8.7                        | .66            |
| <b>Physicians' assessment of patient and consultation</b>                        |                       |                          |                            |                |
| Degree of knowing the patient                                                    | 5                     | 3.6                      | 3.6                        | .90            |
| Perception that psychosocial factors are involved                                | 5                     | 2.6                      | 2.7                        | .07            |
| Psychosocial reason for the encounter, %                                         | 2                     | 21.5                     | 25.3                       | .01            |
| Own biomedical-informational performance                                         | 0–10                  | 7.4                      | 7.3                        | .07            |
| Own psychosocial performance                                                     | 0–10                  | 6.9                      | 6.7                        | .07            |
| Doctor-patient relationship                                                      | 0–10                  | 7.8                      | 7.7                        | .11            |

*continued*

**Supplemental Table, *continued*****Physician baseline variables**

|                                                 |      |            |           |       |
|-------------------------------------------------|------|------------|-----------|-------|
| Age, years                                      |      | 44.5       | 44.2      | .34   |
| Sex, % women                                    | 2    | 34.0       | 32.3      | .30   |
| Gatekeeper function, %                          | 2    | 42.0       | 45.1      | .06   |
| Consultation time, minutes (standard deviation) | 2-29 | 11.1 (6.9) | 9.4 (8.1) | <.001 |

Note: Comparison between patients with complete datasets, including video analysis of the consultation, and patients excluded. For ordinal variables (eg, Likert-scales), the mean values are presented. For these variables, the *P* values were obtained from 2-sided chi-square tests.

\* Range from 1-3 in which 1 = basic level of education, eg, compulsory schools; 2 = intermediate level of education, eg, any formal nonacademic vocational training or apprenticeship; 3 = high level of education, eg, university or equivalent education.
